# Supplementary material for: Assembly of the Transmembrane Domain of E. coli PhoQ Histidine Kinase: Implications for Signal Transduction from Molecular Simulations
Source: PubMed Central journal article supplement (PMC3554529; doi:10.1371/journal.pcbi.1002878), 2013-01-24
Supplement: pcbi.1002878.s005.pdf [file pcbi.1002878.s005.pdf]

|     |                          |    |                |
|-----|--------------------------|----|----------------|
|     | 21                       | 42 |                |
| TM1 | FLLATAAVVLVLSLAYGMVAL    |    | uniprot        |
|     | FLLATAAVVLVLSLAYGMVALIG  |    | HMMTOP         |
|     | ATAAVVLVLSLAYGMVALIGYSV  |    | TMHMM          |
|     | FLLATAAVVLVLSLAYGMVALIGY |    | TMpred         |
|     | FLLATAAVVLVLSLAYGMVALIG  |    | Octopus        |
|     | FLLATAAVVLVLSLAYGMV      |    | Soctopus       |
|     | FLLATAAVVLVLSLAYGMVALIGY |    | psired         |
|     | FLLATAAVVLVLSLAYGMVAL    |    | topcons single |
|     | FLLATAAVVLVLSLAYGMVAL    |    | DAS            |

|     |                          |     |                |
|-----|--------------------------|-----|----------------|
|     | 195                      | 215 |                |
| TM2 | FIYVLSANLLLVIPLLWVAAW    |     | uniprot        |
|     | VWSWFIYVLSANLLLVIPLLWVAA |     | HMMTOP         |
|     | WFIYVLSANLLLVIPLLWVAAWW  |     | TMHMM          |
|     | FIYVLSANLLLVIPLLWVAAW    |     | TMpred         |
|     | SWFIYVLSANLLLVIPLLWVA    |     | Octopus        |
|     | SWFIYVLSANLLLVIPLLWVA    |     | Soctopus       |
|     | FIYVLSANLLLVIPLLWVAAW    |     | psired         |
|     | FIYVLSANLLLVIPLLWVAAWW   |     | topcons single |
|     | FIYVLSANLLLVIPLLWVA      |     | DAS            |
