# Supplementary material for: Assembly of the Transmembrane Domain of E. coli PhoQ Histidine Kinase: Implications for Signal Transduction from Molecular Simulations
Source: PubMed Central journal article supplement (PMC3554529; doi:10.1371/journal.pcbi.1002878), 2013-01-24
Supplement: pcbi.1002878.s006.pdf [file pcbi.1002878.s006.pdf]

| System                   | Membrane | Number of atoms | Simulation time |
|--------------------------|----------|-----------------|-----------------|
| TM1 monomer              | POPC     | 27,333          | 50 ns           |
| TM2 monomer              | POPC     | 27,956          | 50 ns           |
| Dimerization TM1         | DODE     | 40,700          | 100 ns          |
| Dimerization TM2         | DODE     | 40,700          | 100 ns          |
| Dimerization TM1-<br>TM2 | DODE     | 40,700          | 100 ns          |
| Initial tetramer         | DODE     | 40,000          | 60 ns           |
| Initial tetramer         | POPE     | 47,300          | 80 ns           |
| Extended tetramer        | POPE     | 51,200          | 150 ns          |
| N202A                    | POPE     | 51,200          | 100 ns          |
| N202H                    | POPE     | 51,200          | 100 ns          |
| N202R                    | POPE     | 51,200          | 100 ns          |
| Metadynamics             | POPE     | 51,200          | 3x30ns          |
